# International authorship and collaboration in bioRxiv preprints

Richard J. Abdill<sup>1</sup>, Elizabeth M. Adamowicz<sup>1</sup>, Ran Blekhman<sup>1,2\*</sup>

1 – Department of Genetics, Cell Biology, and Development, University of Minnesota, Minneapolis, MN, USA

2 – Department of Ecology, Evolution, and Behavior, University of Minnesota, St. Paul, MN, USA

\* – Please direct correspondence to [blekhman@umn.edu](mailto:blekhman@umn.edu)

## 1 Abstract

2 As preprints become more integrated into the conventional avenues of scientific communication,  
3 it is critical to understand who is being included and who is not. However, little is known about  
4 which countries are participating in the phenomenon or how they collaborate with each other.  
5 Here, we present an analysis of 67,885 preprints posted to bioRxiv from 2013 through 2019 that  
6 includes the first comprehensive dataset of country-level affiliations for all preprint authors. We  
7 find the plurality of preprints (37%) come from the United States, more than three times as many  
8 as the next-most prolific country, the United Kingdom (10%). We find some countries are  
9 overrepresented on bioRxiv relative to their overall scientific output: The U.S. and U.K. are again  
10 at the top of the list, with other countries such as China, India and Russia showing much lower  
11 levels of bioRxiv adoption despite comparatively high numbers of scholarly publications. We  
12 describe a subset of “contributor countries” including Uganda, Croatia, Thailand, Greece and  
13 Kenya, which appear on preprints almost exclusively as part of international collaborations and  
14 seldom in the senior author position. Lastly, we find multiple journals that disproportionately favor  
15 preprints from some countries over others, a dynamic that almost always benefits manuscripts with  
16 a senior author affiliated with the United States.

## 17 Introduction

18 Biology preprints are being shared online at an unprecedented rate (Narock and Goldstein 2019;  
19 Abdill and Blekhman 2019b). Since 2013, more than 73,000 preprints have been posted to  
20 bioRxiv.org, the largest preprint server in the life sciences, including 29,178 in 2019 alone (Abdill  
21 and Blekhman 2019a). In addition to their rising popularity among researchers seeking to share  
22 their work outside the traditional pipelines of peer-reviewed journals, preprints provide authors  
23 with numerous potential benefits: Preprints may receive more citations after publication (Fu and  
24 Hughey 2019; Fraser et al. 2020), and journals proactively search preprint servers to solicit  
25 submissions (Barsh et al. 2016; Vence 2017). Programs such as In Review  
26 (<https://researchsquare.com>) and Review Commons (<https://www.reviewcommons.org>)  
27 coordinate with journals for peer review of preprints, and in late 2019 the journal *eLife* announced  
28 a “Preprint Review” program in which bioRxiv preprints submitted to *eLife* would be guaranteed  
29 to be sent out for peer review (Eisen 2019). A growing number of programs are being launched to  
30 encourage the use of preprints, and, in the cases of Review Commons and *eLife*, the use of bioRxiv  
31 specifically. However, very little is known about who is benefiting from this attention, who  
32 remains left out, and how the technical and professional challenges of this new publishing  
33 paradigm impact different groups (Penfold and Polka 2020). Despite all the recent research about  
34 preprints, one critical question remains: Where do they come from? More specifically, which

35 countries are participating in the preprint ecosystem, how are they working with each other, and  
36 what happens when they do?

37  
38 To answer these questions, we looked at country-level participation and outcomes. Academic  
39 publishing has grappled for decades with hard-to-quantify concerns about unspoken (and  
40 occasionally unconscious) factors of success that are not directly linked to research quality. Studies  
41 have found bias in favor of wealthy, English-speaking countries in citation count (Akre et al. 2011)  
42 and the acceptance of both papers (Saposnik et al. 2014; Okike et al. 2008) and conference  
43 abstracts (Ross et al. 2006). There have also long been concerns regarding how the peer review  
44 process is influenced by institutional prestige, among other factors (Lee et al. 2013). Preprints have  
45 been praised as a democratizing influence on scientific communication (Berg et al. 2016), and the  
46 unlinking of research dissemination from peer review may dramatically alter the publishing  
47 landscape. Research suggests U.S. authors are overrepresented on bioRxiv compared to published  
48 literature (Fraser et al. 2020), but the scientific community lacks a more specific understanding of  
49 who is availing themselves of preprint-based research dissemination opportunities. Here, we aim  
50 to answer these questions by analyzing a dataset of all preprints posted to bioRxiv through 2019.  
51 After collecting author-level metadata for each preprint, we determined each author's institutional  
52 affiliation to summarize authorship measurements at national levels.

## 53 Results

### 54 Preprint origins

55 We retrieved author data for 67,885 preprints for which the most recent version was posted before  
56 January 1, 2020. First, we attributed each preprint to a single country, using the affiliation of the  
57 last individual in the author list, considered by convention in the life sciences to be the “senior  
58 author” who supervised the work (see **Methods**). 25,305 manuscripts (37.3%) have a senior author  
59 from the United States, followed by 6,845 manuscripts (10.1%) from the United Kingdom (**Fig.**  
60 **1a**). North America, Europe and Australia dominate the top spots, though China (3.6%), Japan  
61 (1.8%) and India (1.6%) are the sources of more than 1,100 preprints each (**Fig. 1b**). Brazil, with  
62 646 manuscripts, has the 15th-most preprints and is the first South American country on the list,  
63 followed by Argentina (151 preprints) in 32nd place. South Africa (179 preprints) is the first  
64 African country on the list, in 28th place, followed by Ethiopia (57 preprints) in 41st place  
65 (**Supplementary Table 1**). Interestingly, both South Africa and Ethiopia were found to have high  
66 opt-in rates for a program operated by PLOS journals that enabled submissions to be sent directly  
67 to bioRxiv (“Trends in Preprints” 2019).

68  
69 These attributions were made using the author listed last on each preprint, but we found similar  
70 results when we looked at which countries were most highly represented based on authorship at  
71 any position (**Table 1**). Overall, U.S. authors appear on the most bioRxiv preprints—33,968  
72 manuscripts (50.0%) include at least one U.S. author (**Fig. 1c**).

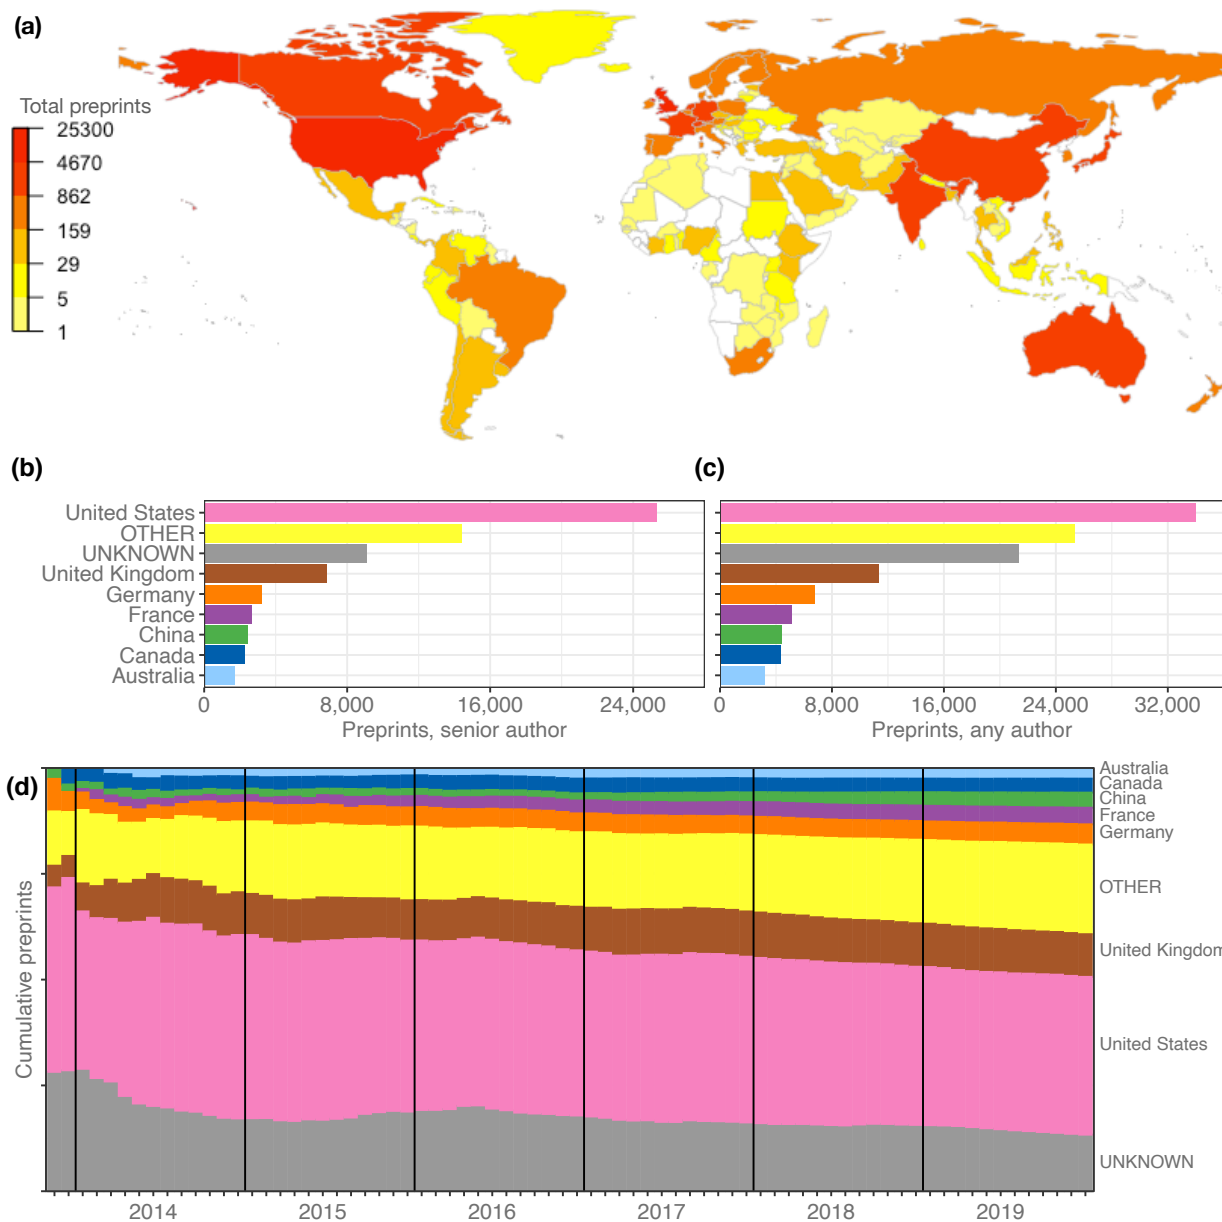

73  
74  
75 **Figure 1. Preprints per country.** (a) A heat map indicating the number of  
76 preprints per country, based on the institutional affiliation of the senior author. The  
77 color coding uses a log scale that splits the full range of preprint counts into six  
78 colors. (b) The total preprints attributed to the seven most prolific countries. The x-  
79 axis indicates total preprints listing a senior author from a country; the y-axis  
80 indicates the country. The “OTHER” category includes preprints from all countries  
81 not listed in the plot. (c) Similar to panel b, but showing the total preprints listing  
82 at least one author from the country in any position, not just the senior position. (d)  
83 Proportion of total senior-author preprints from each country (y-axis) over time (x-  
84 axis), starting in November 2013 and continuing through December 2019. Each  
85 colored segment indicates the proportion of total preprints attributed to a single  
86 country, as of the end of the month indicated on the x-axis. Colors indicate  
countries, using the same scale as panels B and C.

87  
88 Over time, the country-level proportions on bioRxiv have remained remarkably stable (**Fig. 1d**),  
89 even as the number of preprints grew exponentially: At the end of 2015, Germany accounted for  
90 4.5% of bioRxiv’s 2,460 manuscripts. At the end of 2019, Germany was responsible for 4.8% of  
91 67,885 preprints. However, the proportion of preprints from countries outside the top seven  
92 contributing countries is growing slowly (**Fig. 1d**): At the end of 2015, these countries accounted  
93 for 17.6 percent of preprints. By the end of 2019, that number had grown to 21.2 percent, when  
94 bioRxiv hosted preprints from senior authors affiliated with 135 countries.  
95

| Country        | Preprints, senior author (proportion) | Preprints, any author (proportion) |
|----------------|---------------------------------------|------------------------------------|
| United States  | 25,305 (37.3%)                        | 33,968 (50.0%)                     |
| (Unknown)      | 9,077 (13.4%)                         | 21,332 (31.4%)                     |
| United Kingdom | 6,845 (10.1%)                         | 11,335 (16.7%)                     |
| Germany        | 3,234 (4.8%)                          | 6,772 (10.0%)                      |
| France         | 2,669 (3.9%)                          | 5,088 (7.5%)                       |
| China          | 2,419 (3.6%)                          | 4,400 (6.5%)                       |
| Canada         | 2,245 (3.3%)                          | 4,294 (6.3%)                       |
| Australia      | 1,704 (2.5%)                          | 3,213 (4.7%)                       |
| Switzerland    | 1,234 (1.8%)                          | 2,656 (3.9%)                       |
| Netherlands    | 1,200 (1.8%)                          | 2,701 (4.0%)                       |
| Japan          | 1,195 (1.8%)                          | 2,242 (3.3%)                       |
| India          | 1,107 (1.6%)                          | 1,656 (2.4%)                       |

96 **Table 1. Preprints per country.** All 11 countries with more than 1,000 preprints  
97 attributed to a senior author affiliated with that country. The percentages in the  
98 “Preprints, any author” column sum to more than 100 percent because preprints  
99 may be counted for more than one country. A full list of countries is provided in  
100 **Supplemental Table 1.**  
101

102 We noted that some patterns may be obscured by countries that had hundreds or thousands of times  
103 as many preprints as other countries, so we re-evaluated these ranks after adjusting for overall  
104 scientific output (**Fig. 2**). This was measured by the number of “citable documents” associated  
105 with each country from 2014 through 2018 in the SCImago Journal & Country Rank portal  
106 (“Scimago Journal & Country Rank” n.d.). For all countries with at least 3,000 citable documents  
107 and 50 preprints, we generated a productivity-adjusted score, termed “bioRxiv adoption,” by  
108 taking the proportion of preprints with a senior author from that country and dividing it by that  
109 country’s proportion of citable documents from 2014–2018. **Fig. 2a** illustrates this relationship:  
110 Given a country’s total citable documents and total preprints, the diagonal line represents an  
111 adoption score of 1.0, which would indicate that a country’s share of bioRxiv preprints is identical  
112 to its share of general scholarly outputs; a score of 2.0 would indicate that its share of preprints is  
113 twice as high as its share of other scholarly outputs (See **Discussion** for more about this  
114 measurement.)  
115

116 The U.S. posted 25,305 preprints and published about 2.8 million citable documents, for a bioRxiv  
117 adoption score of 2.15 (**Fig. 2b**). Seven of the nine countries with adoption scores above 1.0 were

118 from North America and Europe, but Israel has the third-highest score (1.46) based on its 565  
 119 preprints. Ethiopia has the fifth-highest bioRxiv adoption (1.19): Though only 57 preprints list a  
 120 senior author with an affiliation in Ethiopia, the country had a total of 11,624 citable documents  
 121 published between 2014 and 2018 (**Supplementary Table 2**). In other words, 4.9 out of every  
 122 1,000 Ethiopian research outputs is on bioRxiv, compared to 8.9 out of every 1,000 American  
 123 research outputs.

124  
 125 By comparison, some countries are present on bioRxiv at much lower frequencies than would be  
 126 expected, given their participation in scientific publishing in general (**Fig. 2c**): Turkey, for  
 127 example, published 201,860 citable documents from 2014 through 2018 but was the senior author  
 128 on only 71 preprints, for a bioRxiv adoption score of 0.09. Russia (241 preprints), Malaysia (72  
 129 preprints), Iran (116 preprints) and Greece (54 preprints) all have adoption scores below 0.18. The  
 130 largest country with a low adoption score is China (2,506,694 citable documents; 2,419 preprints;  
 131 bioRxiv adoption=0.23), which published more than 15 percent of the world’s citable documents  
 132 (according to SCImago) but was the source of only 3.6 percent of preprints (**Fig. 2b**).

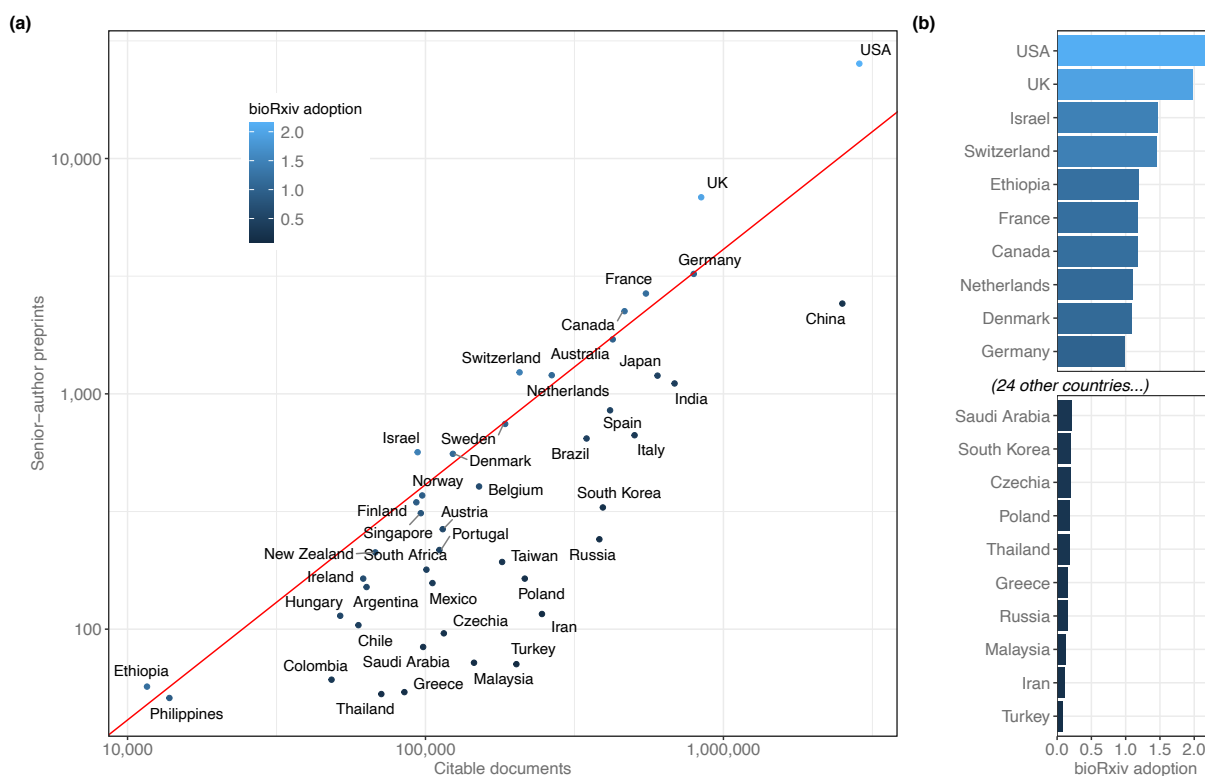

133  
 134  
 135 **Figure 2. BioRxiv adoption per country. (a)** Correlation between two scientific  
 136 output metrics. Each point is a country; the x-axis (log scale) indicates the total  
 137 citable documents attributed to that country from 2014–2018, and the y-axis (also  
 138 log scale) indicates total senior-author preprints attributed to that country overall.  
 139 The red line demarcates a “bioRxiv adoption” score of 1.0, indicating that a country  
 140 is as represented on bioRxiv as they are in published literature. Countries to the left  
 141 of this line have a bioRxiv adoption score greater than 1.0. **(b)** The countries with  
 142 the 10 highest and 10 lowest bioRxiv adoption scores. The x-axis indicates each  
 country’s adoption score, and the y-axis lists each country in order. Data from this

143 figure is available in **Supplementary Table 2**. All panels include only countries  
144 with at least 50 preprints.

## 145 Collaboration

146 After analyzing preprints using senior authorship, we also evaluated interactions *within*  
147 manuscripts to better understand collaborative patterns found on bioRxiv. We found the number  
148 of authors per paper increased from 3.08 in 2014 to 4.26 at the end of 2019 (**Fig. S1**). The monthly  
149 average authors per preprint has increased linearly with time (Pearson's  $r=0.9488$ ,  $p=8.93\times 10^{-38}$ ),  
150 a pattern that has also been observed (at a less dramatic rate) in published literature (Adams et al.  
151 2005; Wuchty, Jones, and Uzzi 2007; Bordons, Aparicio, and Costas 2013). Examining the number  
152 of countries represented in each preprint (**Fig. S1**), we found that 24,011 preprints (35.4%)  
153 included authors from two or more countries; 2,867 preprints (4.2%) were from four or more  
154 countries, and one preprint, "Fine-mapping of 150 breast cancer risk regions identifies 178 high  
155 confidence target genes," listed 319 authors from 39 countries, the most countries listed on any  
156 single preprint. The mean number of countries represented per preprint is 1.836, which has  
157 remained fairly stable since 2014 despite steadily growing author lists overall (**Fig. S1**).

158  
159 We then looked at countries appearing on at least 50 international preprints to examine basic  
160 patterns in international collaboration. We found many countries with comparatively low output  
161 contributed almost exclusively to international collaborations: For example, researchers listing an  
162 affiliation in Vietnam appear on 76 preprints; 73 (96.1%) include at least one researcher from  
163 another country. Similarly, Uganda, Tanzania, Croatia, Ecuador and Peru also have international  
164 collaboration rates of greater than 90%.

165  
166 Upon closer examination, we found these countries were part of a larger group, which we call  
167 "contributor countries," that (1) appear mostly on preprints with authors from other countries, but  
168 (2) seldom as the senior author. For this analysis, we defined a contributor country as one that has  
169 contributed to at least 50 international preprints but appears in the senior author spot of less than  
170 20 percent of them. (We excluded countries with less than 50 preprints to minimize the effect of  
171 dynamics that could be explained by countries with just one or two labs that frequently worked  
172 with international collaborators.) 18 countries met these criteria (**Fig. 3a**). Of these, Uganda had  
173 the lowest international senior-author rate: Of the 84 international preprints that include an author  
174 with an affiliation in Uganda, only 5 preprints (6.0%) include a senior author from Uganda. Other  
175 countries with low senior-author rates include Vietnam (8.2%), Tanzania (8.2%) and Croatia  
176 (9.7%). By comparison, the highest international senior-author rate was observed for the United  
177 States, which appears as senior author on 47.2% of all international preprints it contributes to (**Fig.**  
178 **3b**).

179  
180 In addition to a high percentage of international collaborations and a low percentage of senior-  
181 author preprints, another characteristic of contributor countries is a comparatively low number of  
182 preprints overall. To define this subset of countries more clearly, we examined whether there was  
183 a relationship between any of the three factors we identified, but across all countries with at least  
184 30 international preprints, rather than only among contributors. We found consistent patterns for  
185 all three (see **Methods**): First, countries with fewer international collaborations also tend to appear  
186 as senior author on a smaller proportion of those preprints (Spearman's  $\rho=0.616$ ,  $p=1.513\times 10^{-9}$ ;

187 **Fig. S2a**). We also observed a negative correlation between *total* international collaborations and  
 188 international collaboration *rate*—that is, the proportion of preprints a country contributes to that  
 189 include at least one contributor from another country (**Fig. S2b**; Spearman’s  $\rho=-0.543$ ,  
 190  $p=2.408\times 10^{-7}$ ). This indicates that countries with mostly international preprints (**Fig. 3c**) also  
 191 tended to have *fewer* international collaborations (**Fig. 3d**) than other countries. Finally, we found  
 192 a negative correlation between international collaboration rate and the proportion of international  
 193 preprints for which a country appears as senior author (Spearman’s  $\rho=-0.492$ ,  $p=4.114\times 10^{-6}$ ; **Fig.**  
 194 **S2c**), demonstrating that countries that appear mostly on international preprints (**Fig. 3c**) are less  
 195 likely to appear as senior author of those preprints (**Fig. 3b**). Similar patterns have been observed  
 196 in previous studies: González-Alcaide et al. (2017) found countries ranked lower on the Human  
 197 Development Index participated more frequently in international collaborations, and a review of  
 198 oncology papers found that researchers from low- and middle-income countries collaborated on  
 199 randomized control trials, but rarely as senior author (Wong et al. 2014).

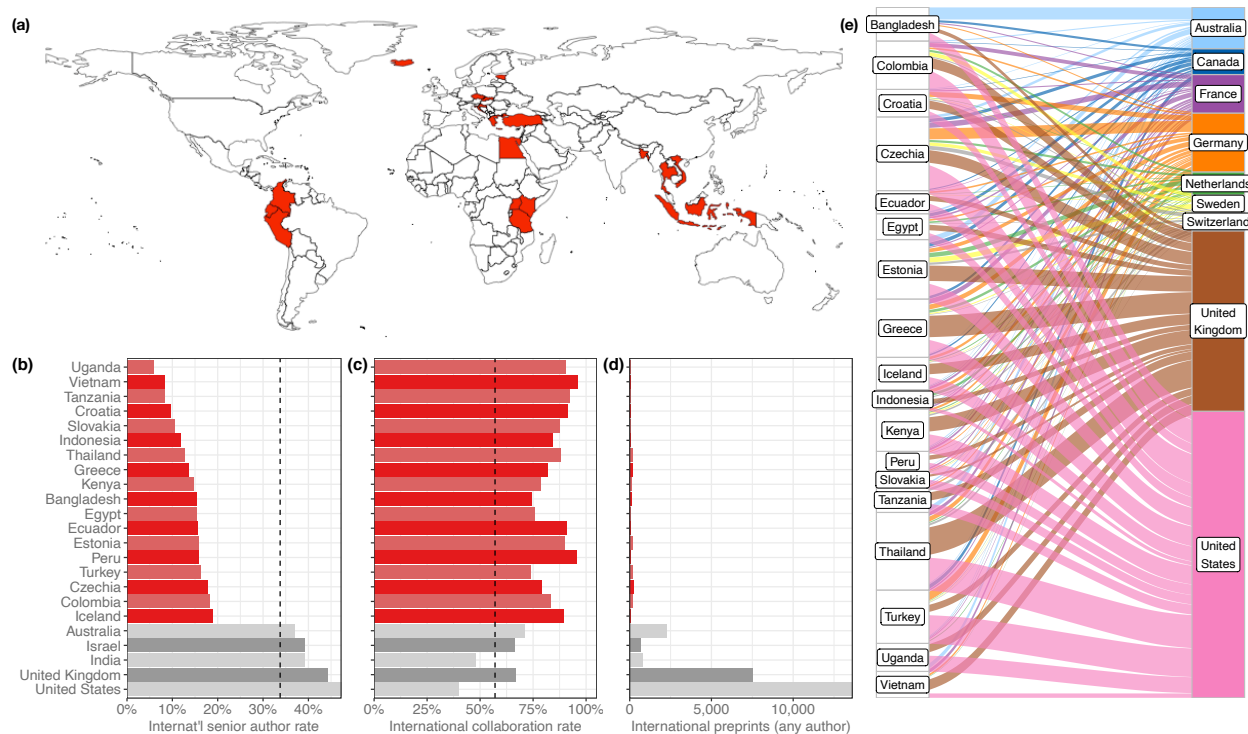

200 **Figure 3. Contributor countries.** (a) World map indicating (in red) the location  
 201 of contributor countries, defined as all countries listed on at least 50 international  
 202 preprints, but as senior author on less than 20% of them. (b) Bar plot indicating the  
 203 international senior author rate (y-axis) by country (x-axis)—that is, of all  
 204 international preprints with a contributor from that country, the percentage of them  
 205 that include a senior author from that country. All 18 contributor countries are listed  
 206 in red, with the five countries with the highest senior-author rates (in grey) for  
 207 comparison. (c) A bar plot with the same y-axis as panel (b). The x-axis indicates  
 208 the international collaboration rate, or the proportion of preprints with a contributor  
 209 from that country that also include at least one author from another country. (d) is  
 210 a bar plot indicating the total international preprints featuring at least one author  
 211 from that country (the median value per country is 19). Expanded data from this  
 212 figure is available as **Supplemental Table 3**. (e) On the left are the 18 contributor  
 213

214 countries. On the right are the countries that appear in the senior author position of  
215 preprints that were co-authored with contributor countries. (Supervising countries  
216 with 25 or fewer preprints with contributor countries were excluded from the  
217 figure.) The width of the ribbons connecting contributor countries to senior-author  
218 countries indicates the number of preprints supervised by the senior-author country  
219 that included at least one author from the contributor country.  
220

221 After generating a list of preprints with authors from contributor countries, we examined which  
222 countries appeared most frequently in the senior author spot of those preprints (**Fig. 3e**). Among  
223 the 1,824 preprints with an author from a contributor country, 521 (28.6%) had senior authors  
224 listing an affiliation in the United States (**Supplementary Table 3**). The United Kingdom was  
225 listed as senior author on the next-most preprints with contributor countries, at 328 (18.0%),  
226 followed by Germany (5.9%) and France (3.8%). Given the large differences in preprint authorship  
227 between countries, we tested which of these senior-author relationships was disproportionately  
228 large. After multiple-test correction using the Benjamini–Hochberg procedure, we found seven  
229 links between contributor countries and senior-author countries that were significant  
230 (**Supplementary Table 4**). The strongest link is between Bangladesh and Australia: Of the 83  
231 preprints with a contributor from Bangladesh, Australia appears as the senior author on 22 of them  
232 (Fisher’s exact test,  $q=2.60\times 10^{-12}$ ). The United States is also frequently senior author on preprints  
233 with a contributor in Turkey (52 of 83 preprints,  $q=0.012$ ). The remaining five links were between  
234 a contributor country and the United Kingdom, which appears as senior author with  
235 disproportionate frequency on preprints with authors in Thailand ( $q=4.73\times 10^{-5}$ ), Greece  
236 ( $q=0.0016$ ), Kenya ( $q=0.012$ ), Vietnam ( $q=0.012$ ) and Iceland ( $q=0.040$ ).

## 237 Outcomes

238 After quantifying which countries were posting preprints, we also examined whether there were  
239 differences in preprint outcomes between countries. We obtained monthly download counts for all  
240 preprints, as well as publication status, the publishing journal, and date of publication for all  
241 preprints flagged as “published” on bioRxiv (see **Methods**). We then evaluated country-level  
242 patterns for the 35 countries with at least 100 senior-author preprints.  
243

244 Overall, the median number of PDF downloads per preprint is 336 (**Fig. 4a**). Among countries  
245 with at least 100 preprints, Austria has the highest median downloads per preprint, with 385.5,  
246 followed by the United States (369) and Denmark (368.5). Taiwan has the lowest median, at 196  
247 downloads. Next-fewest is Argentina (205), Brazil (220) and a tie at 235 downloads between  
248 Mexico and South Korea. Across all countries with at least 100 preprints, there was a weak  
249 correlation between total preprints attributed to a country and the median downloads per preprint  
250 (Spearman’s  $\rho=0.484$ ,  $p=0.00323$ ) (**Fig. 4b**), and another correlation between median downloads  
251 per preprint and the country’s publication rate (Spearman’s  $\rho=0.725$ ,  $p=8.43\times 10^{-7}$ ) (**Fig. 4c**).  
252

253 Next, we examined country-level publication rates by assigning preprints posted prior to 2019 to  
254 countries using the affiliation of the senior author, then measuring the proportion of those preprints  
255 flagged as “published” on the bioRxiv website. Overall, 62.6 percent of pre-2019 preprints were  
256 published (**Supplementary Table 5**). Ireland had the highest publication rate (**Fig. 4d**), with 48  
257 of their 65 preprints (73.9%) published before March 2020, followed by New Zealand (90 of 127,



258 70.9%) and Switzerland (455 of 651, 69.9%). Among countries with at least 350 preprints prior to  
 259 2019, Switzerland had the highest publication rate, followed by Germany (1104 of 1630, 67.7%),  
 260 the Netherlands (414 out of 620, 66.8%) and France (898 of 1350, 66.5%). The lowest publication  
 261 rates were observed for Iran (26 of 60, 43.3%) and China (508 of 1155, 44.0%); South Korea,  
 262 India, Brazil and Taiwan all had publication rates below 50 percent.

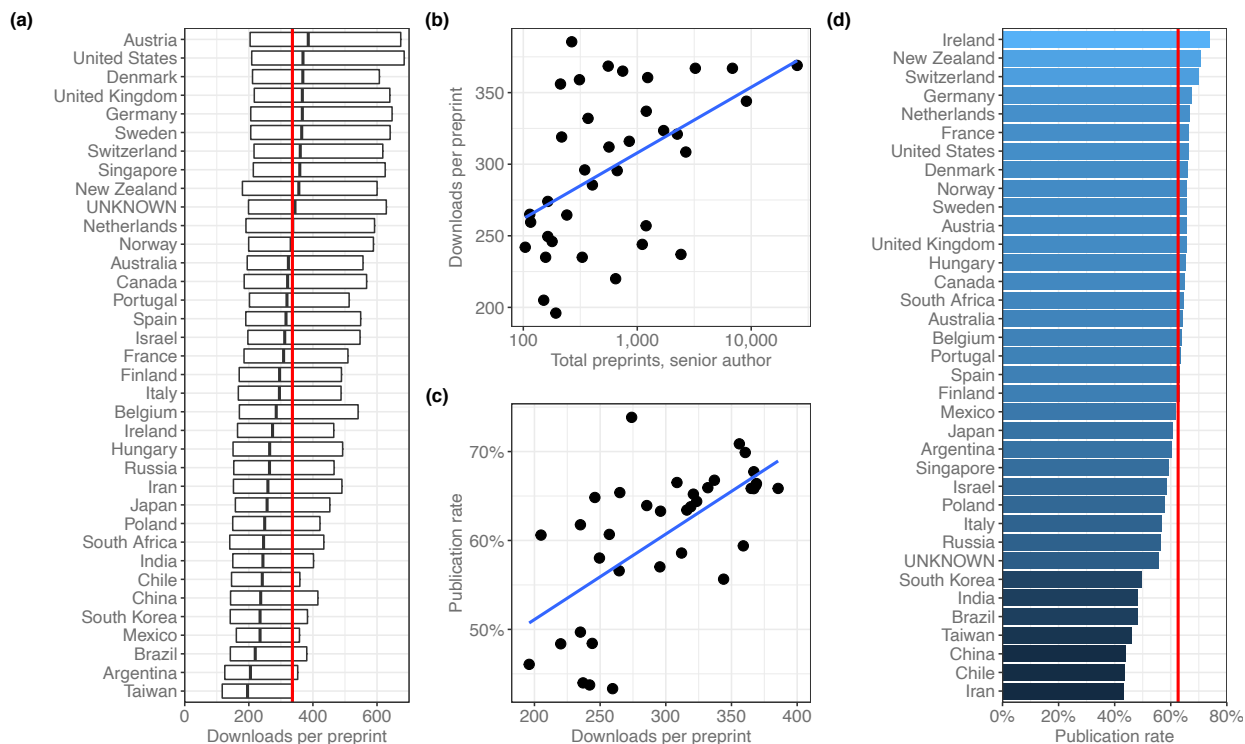

263  
 264  
 265 **Figure 4. Preprint outcomes.** All panels include countries with at least 100 senior-  
 266 author preprints. **(a)** A box plot indicating the number of downloads per preprint  
 267 for each country. The dark line in the middle of the box indicates the median, and  
 268 the ends of each box indicate the first and third quartiles, respectively. “Whiskers”  
 269 and outliers were omitted from this plot for clarity. The red line indicates the overall  
 270 median. **(b)** A plot showing the relationship between total preprints and downloads.  
 271 Each point represents a single country. The x-axis indicates the total number of  
 272 senior-author preprints attributed to the country. The y-axis indicates the median  
 273 number of downloads for those preprints. **(c)** A plot showing the relationship  
 274 between downloads and publication rate. Each point represents a single country.  
 275 The x-axis indicates the median number of downloads for all preprints listing a  
 276 senior author affiliated with that country. The y-axis indicates the proportion of  
 277 preprints posted before 2019 that have been published. **(d)** A bar plot indicating the  
 278 proportion of preprints posted before 2019 that are now flagged as “published” on  
 279 the bioRxiv website. The x-axis (and color scale) indicates the proportion, and the  
 280 y-axis lists each country. The red line indicates the overall publication rate.

281 After evaluating the country-level publication rates, we examined which journals were publishing  
 282 these preprints and whether there were any meaningful country-level patterns (**Fig. 5**). We  
 283 quantified how many senior-author preprints from each country were published in each journal  
 284 and used the  $\chi^2$  test (with Yates's correction for continuity) to examine whether a journal published

285 a disproportionate number of preprints from a given country, based on how many preprints from  
 286 that country were published overall. To minimize the effect of journals with differing review times,  
 287 we limited the analysis to preprints posted before 2019, resulting in a total of 23,102 published  
 288 preprints.

289  
 290 After controlling the false-discovery rate using the Benjamini–Hochberg procedure, we found 53  
 291 significant links between journals and countries (**Fig. 5a**; including journal–country links with at  
 292 least 15 preprints). Nine countries had links to journals that published a disproportionate number  
 293 of their preprints, but the United States had far more than any other country. 30 of the 53 significant  
 294 links were between a journal and the United States: The U.S. is listed as the senior author on 39.6%  
 295 of published preprints, but accounts for 69.6% of all bioRxiv preprints published in *Cell*, 67.7%  
 296 of preprints published in *Science*, and 58.5% of those published in *Proceedings of the National  
 297 Academy of Sciences (PNAS)* (**Fig. 5b**).

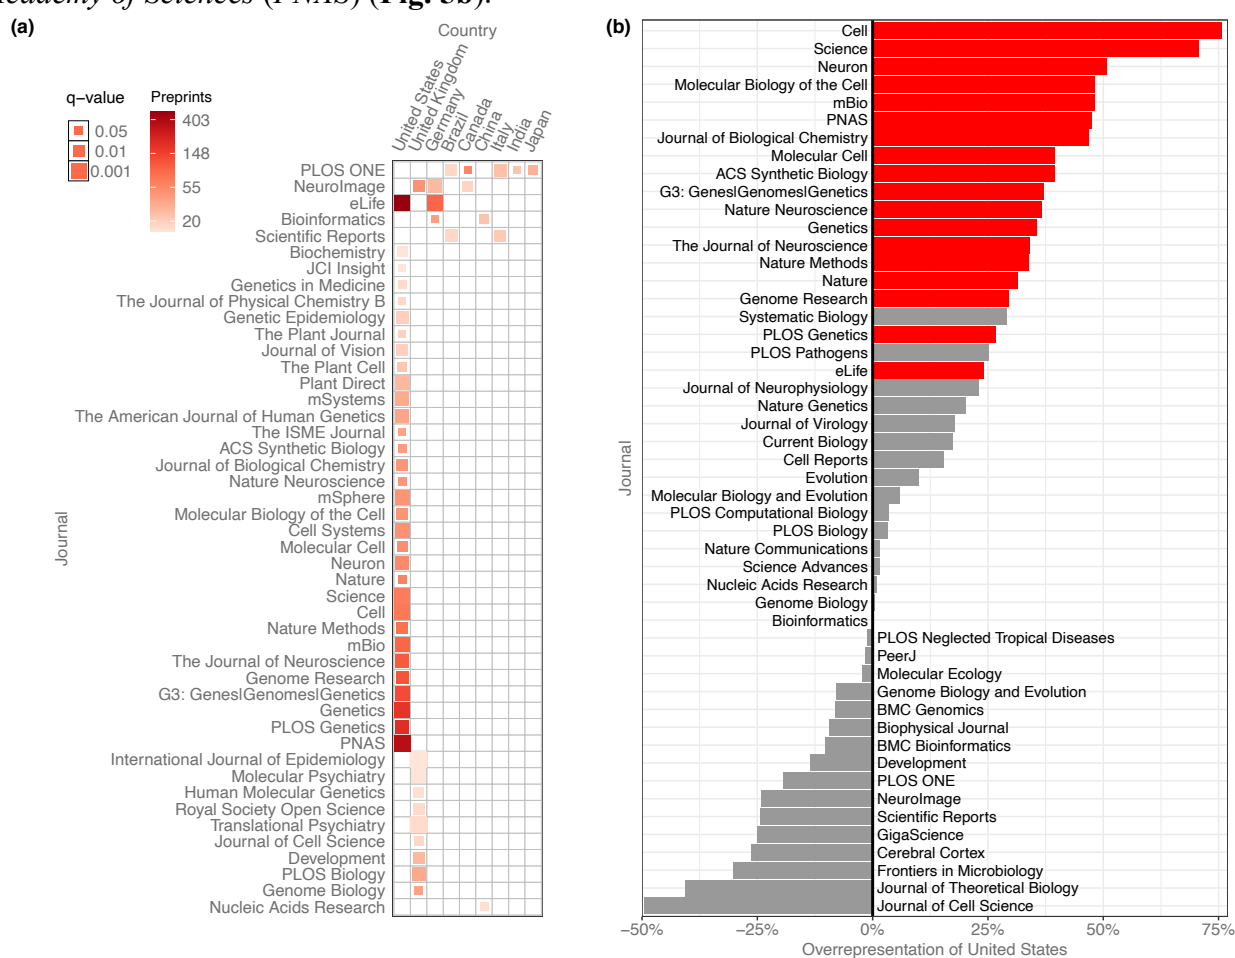

298  
 299  
 300 **Figure 5. Overrepresentation of U.S. preprints.** (a) A heat map indicating all  
 301 disproportionately strong ( $q < 0.05$ ) links between countries and journals, for  
 302 journals that have published at least 15 preprints from that country. Columns each  
 303 represent a single country, and rows each represent a single journal. Colors indicate  
 304 the raw number of preprints published, and the size of each square indicates the  
 305 statistical significance of that link—larger squares represent smaller q-values. (b)  
 306 A bar plot indicating the degree to which U.S. preprints are over- or under-  
 represented in a journal's published bioRxiv preprints. The y-axis lists all the

307 journals that would be expected to have published at least 30 preprints with a U.S.  
308 senior author, based on the proportion of published preprints from the U.S. and the  
309 total number of preprints published by that journal. The x-axis indicates the  
310 overrepresentation of U.S. preprints compared to the expected number: For  
311 example, a value of “0%” would indicate the journal published the same proportion  
312 of U.S. preprints as all journals combined. A value of “100%” would indicate the  
313 journal published twice as many U.S. preprints as expected, based on the overall  
314 representation of the U.S. among published preprints. The red bars indicate which  
315 of these relationships were significant using Benjamini–Hochberg-adjusted results  
316 from  $\chi^2$  tests. All results are available in **Supplementary Table 6**.

## 317 Methods

318 **Ethical statement.** This study was submitted to the University of Minnesota Institutional Review  
319 Board (study #00008793), which determined the work did not qualify as human subjects research  
320 and did not require IRB oversight.

321  
322 **Preprint metadata.** We used existing data from the Rxivist web crawler (Abdill and Blekhman  
323 2019c) to build a list of URLs for every preprint on bioRxiv.org. We then used this list as the input  
324 for a new tool that collects author data: We recorded a separate entry for each author of each  
325 preprint, and stored name, email address, affiliation, ORCID identifier, and the date of the most  
326 recent version of the preprint that has been indexed in the Rxivist database. While the original web  
327 crawler performs author consolidation during the paper index process (i.e. “Does this new paper  
328 have any authors we already recognize?”), this new tool creates a new entry for each preprint; we  
329 make no connections for authors across preprints in this analysis, and infer author country  
330 separately for every author of every paper. It is also important to note that for longitudinal analyses  
331 of preprint trends, each preprint is associated with the date on *its most recent version*, which means  
332 a paper first posted in 2015, but then revised in 2017, would be listed in 2017. The final version  
333 of the preprint metadata was collected in the final weeks of January 2020—because preprints were  
334 filtered using the most recent known date, those posted before 2020, but revised in the first month  
335 of 2020, were not included in the analysis. In addition, 95 preprints were excluded because the  
336 bioRxiv website repeatedly returned errors when we tried to collect the metadata, leaving a total  
337 of 67,885 preprints in the analysis. Of these, there were 2,409 manuscripts (3.6%) for which we  
338 were unable to scrape affiliation data for at least one author, including 137 preprints with no  
339 affiliation information for any author. These preprints were included in the analysis, but all missing  
340 affiliation strings were placed in the “unknown” institution classification.

341  
342 bioRxiv maintains an application programmatic interface (API) that provides machine-readable  
343 data about their holdings. However, the information it exposes about authors and their affiliations  
344 is not as complete as the information available from the website itself, and only the corresponding  
345 author’s institutional affiliation is included (“bioRxiv API (beta)” n.d.). Therefore, we used the  
346 more complete data in the Rxivist database (Abdill and Blekhman 2019b), which includes  
347 affiliations for all authors.

348  
349 All data on published preprints was pulled directly from bioRxiv. However, it is also possible, if  
350 not likely, that the publication of many preprints goes undetected by its system. Fraser et al. (2020)

351 developed a method of searching for published preprints in Scopus and Crossref databases and  
352 found most had already been picked up by bioRxiv’s detection process, though bioRxiv states that  
353 preprints published with new titles or authors can go undetected (“About bioRxiv” n.d.), and  
354 preliminary data suggests this may affect thousands of preprints (Abdill and Blekhman 2019b).  
355 How these effects differ by country of origin remains unclear—perhaps authors from some  
356 countries are more likely to have their titles changed by journal editors, for example—but bias at  
357 the country level may also be more pronounced for other reasons. The assignment of Digital Object  
358 Identifiers (DOIs) to papers provides a useful proxy for participation in the “western” publishing  
359 system. Each published bioRxiv preprint is listed with the DOI of its published version, but DOI  
360 assignment is not yet universally adopted. Boudry and Chartron (2017) examined papers from  
361 2015 indexed by PubMed and found DOI assignment varied widely based on the country of the  
362 publisher. 96% of publications in Germany had a DOI, for example, plus 98% of U.K. publications  
363 and more than 99% of Brazilian publications. However, only 31% of papers published in China  
364 had DOIs, and just 2% (33 out of 1582) of papers published in Russia. Boudry and Chartron (2017)  
365 included the 50 most productive countries in their analysis; of these, we found no relationship  
366 between a country’s preprint publication rate and the rate at which publishers in that country  
367 assigned DOIs (Pearson’s  $r=0.168$ ,  $p=0.245$ ).

368  
369 **Attribution of preprints.** Throughout the analysis, we define the “senior author” for each preprint  
370 as the author appearing last in the author list. In addition to being a longstanding practice in  
371 biomedical literature (Riesenberg and Lundberg 1990; Buehring, Buehring, and Gerard 2007), a  
372 2003 study found that 91 percent of publications indicated a corresponding author that was in the  
373 first- or last-author position (Mattsson, Sundberg, and Laget 2011). Among the 56,002 preprints  
374 for which the country was known for the first and last author, 7,239 (12.9%) preprints included a  
375 first author associated with a different country than the senior author.

376  
377 When examining international collaboration, we also considered whether more nuanced methods  
378 of distributing credit would be more informative. Our primary approach—assigning each preprint  
379 to the one country appearing in the senior author spot—is considered *straight counting* (Gauffriau  
380 et al. 2008). We repeated the process using *complete-normalized counting* (**Supplementary Table**  
381 **7**), which splits a single credit among all authors of a preprint. So, for a preprint with 10 authors,  
382 if six authors are affiliated with an institution in the United Kingdom, the U.K. would receive 0.6  
383 “credits” for that preprint. We found the complete-normalized preprint counts to be almost  
384 identical to the counts distributed based on straight counting (Pearson’s  $r=0.9998$ ,  $p=3.27 \times 10^{-306}$ ).  
385 While there are numerous proposals for proportioning differing levels of recognition to authors at  
386 different positions in the author list (e.g. Hagen 2013; Kim and Diesner 2015), the close link  
387 between the complete-normalized count and the count based on senior authorship indicates that  
388 senior authors are at least an accurate proxy for the overall number of individual authors, at the  
389 country level.

390  
391 When computing the average authors per paper, the harmonic mean is used to capture the average  
392 “contribution” of an author, as in Glänzel and Schubert (2005)—in short, this shows that authors  
393 were responsible for about one-third of a preprint in 2014, but less than one-fourth of a preprint as  
394 of 2019.

395

396 **Data collection and management.** All bioRxiv metadata was collected in a relational PostgreSQL  
397 database (PostgreSQL Global Development Group 2017). The main table, “article\_authors,”  
398 recorded one entry for each author of each preprint, with the author-level metadata described  
399 above. Another table associated each unique affiliation string with an inferred institution (see  
400 **Institutional affiliation assignment** below), with other tables linking institutions to countries and  
401 preprints to publications. (See **Supplemental materials** for a full description of the database  
402 schema.) Analysis was performed by querying the database for different combinations of data and  
403 outputting them into CSV files for analysis in R (R Core Team 2019). For example, data on  
404 “authors per preprint” was collected by associating all the unique preprints in the “article\_authors”  
405 table with a count of the number of entries in the table for that preprint. Similar consolidation was  
406 done at many other levels as well—for example, since each author is associated with an affiliation  
407 string, and each affiliation string is associated with an institution, and each institution is associated  
408 with a country, we can build queries to evaluate properties of preprints grouped by country.  
409

410 **Contributor countries.** The analysis described in the “Collaboration” section measured  
411 correlations between three country-level descriptors, calculated for all countries that contributed  
412 to more than 30 international preprints:

- 413 1. **International collaborations.** The total number of international preprints including at  
414 least one author from that country.
- 415 2. **International collaboration rate.** Of all preprints listing an author from that country, the  
416 proportion of them that includes at least one author from another country.
- 417 3. **International senior-author rate.** Of all the international collaborations associated with  
418 a country, the proportion of them for which that country was listed as the senior author.

419 We examined disproportionate links between contributor countries and senior-author countries by  
420 performing one-tailed Fisher’s exact tests between each contributor country and each senior-author  
421 country, to test the null hypothesis that there is no association between the classifications “preprints  
422 with an author from the contributor country” and preprints with a senior author from the senior-  
423 author country.” To minimize the effect of partnerships between individual researchers affecting  
424 country-level analysis, the senior-author country list included only countries with at least 25  
425 senior-author preprints that include a contributor country, and we only evaluated links between  
426 contributor countries and senior-author countries that included at least 5 preprints.  
427

428 **BioRxiv adoption.** When evaluating bioRxiv participation, we corrected for overall research  
429 output, as documented by SCImago Journal & Country Rank portal (“Scimago Journal & Country  
430 Rank” n.d.) articles, conference papers, and reviews in Scopus-indexed journals (“SJR - Help”  
431 n.d., “Scimago Journal & Country Rank” n.d.) This is not an ideal reference: The SCImago data  
432 does not include 2019 outputs yet and is not specific to life sciences research. However, we used  
433 this because it had consistent data for all countries in our dataset; assuming there were no dramatic  
434 changes in overall output in 2019, the inclusion of more years should not change the bioRxiv  
435 adoption score. Another shortcoming of combining data SCImago and the Research Organization  
436 Registry (see below) is that they use different criteria for the inclusion of separate states. In most  
437 cases, SCImago provides more specific distinctions than ROR: For example, Puerto Rico is listed  
438 separately from the United States in the SCImago dataset, but not in the ROR dataset. We did not  
439 alter these distinctions—as a result, nations with disputed or complex borders may have slightly  
440 inflated bioRxiv adoption scores. For example, preprints attributed to institutions in Hong Kong

441 are counted in the total for China, but the 85,146 citable documents from Hong Kong in the  
442 SCImago dataset are not included in the China total.

443  
444 **Visualization.** All figures were made with R and the ggplot2 package (Wickham 2016), with  
445 colors from the RColorBrewer package (Neuwirth 2014; Woodruff and Brewer 2017). The world  
446 map in Figure 1 was generated using the rworldmap package (South 2011). Code to reproduce all  
447 figures is available on GitHub ([https://github.com/blekmanlab/biorxiv\\_countries](https://github.com/blekmanlab/biorxiv_countries)).

448  
449 **Institutional affiliation assignment.** We used the Research Organization Registry (ROR) API to  
450 translate bioRxiv affiliation strings into canonical institution identities (Research Organization  
451 Registry 2019). We launched a local copy of the database using their included Docker  
452 configuration and linked it to our web crawler's container, to allow the two applications to  
453 communicate. We then pulled a list of every unique affiliation string observed on bioRxiv and  
454 submitted them to the ROR API. We used the response's "chosen" field, indicating the ROR  
455 application's confidence in the assignment, to dictate whether the assignment was recorded. Any  
456 affiliation strings that did not have an assigned result were put into a separate "unknown" category.  
457 As with any study of this kind, we are limited by the quality of available metadata. Though we are  
458 able to efficiently scrape data from bioRxiv, data provided by authors can be unreliable or  
459 ambiguous. There are 465 preprints, for example, in which multiple or all authors on a paper are  
460 listed with the same ORCID, ostensibly a unique personal identifier, including seven preprints for  
461 which 30 or more authors were listed under the same ORCID. We are also limited by the content  
462 of the ROR system: Though there are tens of thousands of institutions in the dataset ("About"  
463 2020) and its basis, the Global Research Identifier Database (GRID), has extensive coverage  
464 around the world ("Statistics" n.d.), the translation of affiliation strings is likely more effective for  
465 regions that have more extensive coverage.

466  
467 **Country-level accuracy of ROR assignments.** Across 67,885 total preprints, we found 488,660  
468 total author entries (one for each author of each preprint). These entries each included one of  
469 136,456 distinct affiliation strings, each of which was processed by the ROR API. We wanted to  
470 measure the accuracy of these assignments. First, we took a random sample of 100 distinct  
471 affiliation strings and found the institution-level error rate to be 9 percent. This yielded a sample  
472 size of 488 affiliation strings at  $p=0.05$ , with 80 percent power to detect an improvement in error  
473 rate from 0.09 to 0.045 (Whitley and Ball 2002). Of the output recorded directly from the ROR  
474 API, we found 61 out of 488 (12.5%) sampled affiliations had been assigned to the wrong  
475 institution, and 38 of 488 (7.8%) had been assigned to the wrong country (**Table 5**). To improve  
476 these rates, we made the manual adjustments described below.

477  
478 We evaluated the affiliation strings classified in the "unknown" category. We did this by first  
479 examining affiliation strings associated with ten or more authors. (The highest number of authors  
480 listing an "unknown" affiliation string was 364, but the median was 1, and the mean was 2.8.) For  
481 these affiliation strings, we broke each string into a list of comma-separated elements. We then  
482 attempted to match the last element from each string list to the ROR institution list. For affiliation  
483 strings where this was unsuccessful, we then identified each institution from the affiliation string  
484 by hand. Several shortcuts were used to do this, including: identifying institutions at other positions  
485 within affiliation strings, rather than the end (e.g. the affiliation string "Université de Tours,  
486 EA2106, Biomolécules et Biotechnologies Végétales, Tours" was assigned the institution

487 “Université de Tours”); defining acronyms present in affiliation strings and matching them to  
488 ROR-listed institutions (e.g. “Veterans Affairs Connecticut Healthcare System” and “VA  
489 Connecticut Healthcare System” affiliation strings should match to the same institution); looking  
490 up the locations of specific institutes (e.g. the Athinoula A. Martinos Center for Biomedical  
491 Imaging, which is at the Massachusetts Institute of Technology); and accounting for variations in  
492 institution listing (e.g. the Adam Mickiewicz University and the Adam Mickiewicz University in  
493 Poznań refer to the same institution).

494  
495 We were able to find classifications for some of them, but there were also corrections made that  
496 placed more affiliations into the “unknown” category—there is an ROR institution called  
497 “Computer Science Department,” for example, that contained spurious assignments. Prior to  
498 correction, 23,158 (17%) distinct affiliation strings were categorized as “unknown,” associated  
499 with 71,947 authors. Manual corrections reduced this to 20,299 affiliation strings associated with  
500 49,447 authors, but other corrections moved incorrectly assigned affiliation strings *into* the  
501 “unknown” category, so there were ultimately 23,754 affiliation strings in the “unknown”  
502 category, associated with 66,544 author entries. While our corrections increased the number of  
503 “unknown” affiliations by 596, the number of author entries associated with those affiliations  
504 decreased by 5,403.

505  
506 There were also corrections made to existing institutional assignments, which were important to  
507 evaluate because institutional assignments were used to make the country-level inferences about  
508 author location. It appears the API struggles with institutions that are commonly expressed as  
509 acronyms—affiliation strings including “MIT,” for example, was sometimes incorrectly coded not  
510 as “Massachusetts Institute of Technology” in the United States, but as “Manukau Institute of  
511 Technology” in New Zealand, even when other clues within the affiliation string indicated it was  
512 the former. Other affiliation strings were more broadly opaque— “Centre for Research in  
513 Agricultural Genomics (CRAG) CSIC-IRTA-UAB-UB,” for example. A full list of manual edits  
514 is included in the “manual\_edits.sql” and “unknown\_corrections.csv” files.

515  
516 In total, 9,378 institutional assignments were corrected or added, affecting 44,619 author entries.  
517 After the corrections were made, we repeated the sampling and evaluation process. We found  
518 precision at the institution level increased from 87.5% to 96.1%, an improvement of  $8.6\% \pm 3.4\%$   
519 (**Table 2**). Precision at the country level went from 92.2% to 96.5%, an improvement of  $4.3\% \pm$   
520  $2.9\%$ .

|                     | Uncorrected      | First correction | Improvement     |
|---------------------|------------------|------------------|-----------------|
| Correct institution | 87.5% $\pm$ 2.9% | 96.1% $\pm$ 1.7% | 8.6% $\pm$ 3.4% |
| Correct country     | 92.2% $\pm$ 2.4% | 96.5% $\pm$ 1.6% | 4.3% $\pm$ 2.9% |

522 **Table 2. Precision of institutional assignment to affiliation strings.** Margins of  
523 error use a 95 percent confidence interval.

524  
525 Next, we evaluated the country-level effects of our corrections by generating an approximation of  
526 precision and recall. An affiliation string that remained unchanged after correction was counted as  
527 a “true positive,” a string that was removed from a country was counted as a “false positive,” and  
528 a string that was added to a country by a correction was counted as a “false negative.” (We counted

529 affiliation strings, rather than the total authors *associated* with those strings, to focus on the ROR  
530 API's capability to assign institutions regardless of the popularity of a given affiliation.)

531  
532 Because our corrected dataset was used as the ground truth in this evaluation, countries with low  
533 precision reflect those with many corrections assigning affiliation strings *out* of that country, and  
534 countries with low recall reflect those that picked up many affiliation strings in the correction.

535  
536 The country with the lowest recall was the Netherlands (85.1%), which had 2,425 affiliations  
537 remain after corrections but also picked up 425 additional ones (**Supplementary Table 8**), mostly  
538 corrections for affiliations linked to Radboud University and Wageningen University that were  
539 either linked to China or placed in the unknown category. Qatar had a similar recall; it maintained  
540 the 102 affiliation strings that were initially assigned but gained 15 more from moving affiliations  
541 related to “Weill Cornell Medicine in Qatar” out of the unknown category.

## 542 Discussion

543 Our study represents the first comprehensive, country-level analysis of bioRxiv preprint  
544 publication and outcomes. While previous studies have split up papers into “USA” and “everyone  
545 else” categories in biology (Fraser et al. 2020) and astrophysics (Schwarz and Kennicutt 2004),  
546 our results provide a broad picture of worldwide participation in the largest preprint server in  
547 biology. We show that the United States is by far the most highly represented country by number  
548 of preprints, followed distantly by the United Kingdom and Germany.

549  
550 By adjusting preprint counts by each country's overall scientific output, we were able to develop  
551 a “bioRxiv adoption” score (**Fig. 2**). The United States and the United Kingdom again had the  
552 highest scores, while countries such as Turkey, Iran and Malaysia were underrepresented even  
553 after accounting for their comparatively low scientific output. Studies have found countries take  
554 very different approaches to research communication. Large-scale differences frequently deal with  
555 balancing the sharing of research findings with the protection of commercial interests (Walsh and  
556 Huang 2014; Caulfield, Harmon, and Joly 2012; Azmi and Alavi 2013), but open science  
557 advocates have argued for years that there can be no “one size fits all” approach to preprints and  
558 open-access publication because of the dramatically different country-level incentive structures,  
559 cultural practices, and access to resources, funding and infrastructure (Debat and Babini 2020;  
560 “Systemic Reforms and Further Consultation Needed to Make Plan S a Success” 2018; Becerril-  
561 García 2019; Mukunth 2019). Further research is required to determine what drives certain  
562 countries to use bioRxiv and other preprint servers—what incentives are present for biologists in  
563 Finland but not Greece, for example—but the current results make it clear that those reading  
564 bioRxiv (or soliciting submissions from the platform) are reviewing a biased sample of worldwide  
565 scholarship.

566  
567 There are two findings that may be particularly informative about the state of open science in  
568 biology. First, we present evidence of contributor countries—countries from which authors appear  
569 almost exclusively in non-senior roles on preprints led by authors from more prolific countries  
570 (**Fig. 3**). While there are many reasons these dynamics could arise, it is worth noting that the  
571 current corpus of bioRxiv preprints contains the same familiar disparities observed in published  
572 literature (Mammides et al. 2016; Burgman, Jarrad, and Main 2015; Wong et al. 2014; González-



573 Alcaide et al. 2017). Critically, we found the three characteristics of contributor countries (low  
574 international collaboration *count*, high international collaboration *rate*, low international senior  
575 author rate) are strongly correlated with each other (**Fig. 3** and **Supplementary Table 9**). When  
576 looking at international collaboration using pairwise combinations of these three measurements,  
577 countries fall along tidy gradients—which means not only that they can be used to delineate  
578 properties of contributor countries, but that if a country fits even one of these criteria, they are  
579 more likely to fit the other two as well.

580  
581 Second, we found numerous country-level differences in preprint outcomes. Differences in  
582 downloads per paper have the most straightforward interpretation: If one of the goals of preprinting  
583 one’s work is to solicit feedback from the community (Sarabipour et al. 2019; Sever et al. 2019),  
584 more “reads” of a preprint may represent an increased probability of receiving helpful feedback,  
585 or at least increased exposure to other researchers in the field. The sources and implications of  
586 these disparities are an open question: What is the effect of Dutch preprints receiving a median of  
587 368.5 downloads per preprint, while Brazilian preprints receive 220? Do preprint authors from the  
588 most-downloaded countries (mostly in western Europe) have broader social-media reach than  
589 authors in low-download countries such as Chile, Argentina and Taiwan? Are preprints from some  
590 countries more likely to be included in newsletters and search alerts? What role does language  
591 play? The observed correlation between country-level publication rate and median downloads per  
592 paper also reinforces the assertion that preprints from some countries generally fare better, and the  
593 observed differences are not solely due to artifacts in bibliometric data. The average preprint from  
594 the United States is downloaded 369 times and has a 66.4 percent chance of being published, while  
595 South Korean preprints receive 36 percent fewer downloads and have a 25 percent reduction in  
596 publication rate. We also found some journals had particularly strong affinities for preprints from  
597 some countries over others: Even when accounting for differing publication rates across countries,  
598 we found dozens of journal–country links that disproportionately favored countries such as the  
599 United States and United Kingdom. While it’s possible some of these relationships are  
600 coincidental, this finding demonstrates that journals can embrace preprints while still perpetuating  
601 some of the imbalances that preprints could be theoretically alleviating.

602  
603 Our study has several limitations. First, bioRxiv is not the only preprint server hosting biology  
604 preprints. For example, arXiv’s “Quantitative Biology” category (<https://arxiv.org/archive/q-bio>)  
605 held 18,024 preprints at the end of 2019 (“arXiv Submission Rate Statistics” 2020), and  
606 repositories such as Indonesia’s INA-Rxiv (<https://osf.io/preprints/inarxiv/>) hold multidisciplinary  
607 collections of country-specific preprints. We chose to focus on bioRxiv for several reasons:  
608 Primarily, bioRxiv is the preprint server most broadly integrated into the traditional publishing  
609 system (see **Introduction**) (Barsh et al. 2016; Vence 2017; Eisen 2019). In addition, bioRxiv  
610 currently holds the largest collection of biology preprints, with metadata available in a format we  
611 were already equipped to ingest (Abdill and Blekhman 2019c). Analyzing data from only a single  
612 repository also avoids the issue of different websites holding metadata that is mismatched or  
613 collected in different ways. Comparing publication rates between repositories would also be  
614 difficult, particularly because bioRxiv is one of the few with an automated method for detecting  
615 when a preprint has been published. Second, this “worldwide” analysis of preprints is explicitly  
616 biased toward English-language publishing. BioRxiv accepts submissions only in English, and the  
617 primary motivation for this work was the attention being paid to bioRxiv by organizations based  
618 mostly in the U.S. and western Europe. In addition, bibliometrics databases such as Scopus and

619 Web of Science have well-documented biases in favor of English-language publications (Mongeon  
620 and Paul-Hus 2016; Archambault et al. 2006; de Moya-Anegón et al. 2007), which could have an  
621 effect on observed publication rates and the bioRxiv adoption scores that depend on scientific  
622 output derived from Scopus.

623  
624 In summary, we find country-level participation on bioRxiv differs significantly from existing  
625 patterns in scientific publishing. Preprint outcomes reflect particularly large differences between  
626 countries: Comparatively wealthy countries in Europe and North America post more preprints,  
627 which are downloaded more frequently, published more consistently, and favored by the largest  
628 and most well-known journals in biology. While there are many potential explanations for these  
629 dynamics, the quantification of these patterns may help stakeholders make more informed  
630 decisions about how they read, write and publish preprints in the future.

## 631 Acknowledgements

632 We thank Alex D. Wade (Chan Zuckerberg Initiative) for his insights on author disambiguation  
633 and the members of the Blekhman lab for helpful discussions. We also thank the Research  
634 Organization Registry community for curating an extensive, freely available dataset on research  
635 institutions around the world.

## 636 Funding and competing interests

637 RB is supported by the National Institutes of General Medicine (R35-GM128716) and a McKnight  
638 Land-Grant Professorship from the University of Minnesota. The funders had no role in study  
639 design, data collection and analysis, or preparation of the manuscript. RA is a volunteer  
640 ambassador for ASAPbio, a nonprofit preprint advocacy organization that is affiliated with Review  
641 Commons.

## 642 Data availability

643 There are several online repositories linked to this study:

- 644 ● The code for the web crawler used to collect the preprint data is available on GitHub at  
645 [https://github.com/blekhmanlab/biorxiv\\_countries](https://github.com/blekhmanlab/biorxiv_countries)
- 646 ● All data used for the analyses is contained in a database snapshot available, along with data  
647 and R code to reproduce all figures, via Zenodo at <https://doi.org/10.5281/zenodo.3762815>
- 648 ● Supplementary tables are available in CSV format in the same Zenodo repository.
- 649 ● Supplementary figures, and legends for the supplementary tables, are available in a  
650 separate file attached to this manuscript.

## 651 References

- 652 Abdill, Richard J., and Ran Blekhman. 2019a. "Complete Rxivist Dataset of Scraped bioRxiv Data." Zenodo.  
653 <https://doi.org/10.5281/ZENODO.2529922>.
- 654 ———. 2019b. "Tracking the Popularity and Outcomes of All bioRxiv Preprints." *eLife* 8 (April): e45133.
- 655 ———. 2019c. "Rxivist.org: Sorting Biology Preprints Using Social Media and Readership Metrics." *PLOS*  
656 *Biology* 17 (5): e3000269.
- 657 "About." 2020. Research Organization Registry. 2020. <https://ror.org/about/>.

- 658 “About bioRxiv.” n.d. bioRxiv. Accessed March 19, 2020. <https://www.biorxiv.org/about-biorxiv>.
- 659 Adams, James D., Grant C. Black, J. Roger Clemmons, and Paula E. Stephan. 2005. “Scientific Teams and  
660 Institutional Collaborations: Evidence from U.S. Universities, 1981–1999.” *Research Policy* 34 (3): 259–85.
- 661 Akre, Olof, Francesco Barone-Adesi, Andreas Pettersson, Neil Pearce, Franco Merletti, and Lorenzo Richiardi.  
662 2011. “Differences in Citation Rates by Country of Origin for Papers Published in Top-Ranked Medical  
663 Journals: Do They Reflect Inequalities in Access to Publication?” *Journal of Epidemiology and Community  
664 Health* 65 (2): 119–23.
- 665 Archambault, Éric, Étienne Vignola-Gagné, Grégoire Côté, Vincent Larivière, and Yves Gingrasb. 2006.  
666 “Benchmarking Scientific Output in the Social Sciences and Humanities: The Limits of Existing Databases.”  
667 *Scientometrics* 68 (3): 329–42.
- 668 “arXiv Submission Rate Statistics.” 2020. arXiv. 2020. [https://arxiv.org/help/stats/2019\\_by\\_area/index](https://arxiv.org/help/stats/2019_by_area/index).
- 669 Azmi, Ida Madiha, and Rokiah Alavi. 2013. “Patents and the Practice of Open Science among Government  
670 Research Institutes in Malaysia: The Case of Malaysian Rubber Board.” *World Patent Information* 35 (3): 235–  
671 42.
- 672 Barsh, Gregory S., Casey M. Bergman, Christopher D. Brown, Nadia D. Singh, and Gregory P. Copenhaver. 2016.  
673 “Bringing PLOS Genetics Editors to Preprint Servers.” *PLOS Genetics* 12 (12): e1006448.
- 674 Becerril-García, Arianna. 2019. “AmeliCA vs Plan S: Same Target, Two Different Strategies to Achieve Open  
675 Access.” *AmeliCA (blog)*. [http://amelica.org/index.php/en/2019/02/10/amelica-vs-plan-s-same-target-two-  
676 different-strategies-to-achieve-open-access/](http://amelica.org/index.php/en/2019/02/10/amelica-vs-plan-s-same-target-two-different-strategies-to-achieve-open-access/).
- 677 Berg, Jeremy M., Needhi Bhalla, Philip E. Bourne, Martin Chalfie, David G. Drubin, James S. Fraser, Carol W.  
678 Greider, et al. 2016. “Preprints for the Life Sciences.” *Science* 352 (6288): 899–901.
- 679 “bioRxiv API (beta).” n.d. Accessed January 16, 2020. <http://api.biorxiv.org/>.
- 680 Bordons, María, Javier Aparicio, and Rodrigo Costas. 2013. “Heterogeneity of Collaboration and Its Relationship  
681 with Research Impact in a Biomedical Field.” *Scientometrics* 96 (2): 443–66.
- 682 Boudry, Christophe, and Ghislaine Chartron. 2017. “Availability of Digital Object Identifiers in Publications  
683 Archived by PubMed.” *Scientometrics* 110 (3): 1453–69.
- 684 Buehring, Gertrude Case, Jessica E. Buehring, and Patrick D. Gerard. 2007. “Lost in Citation: Vanishing Visibility  
685 of Senior Authors.” *Scientometrics* 72 (3): 459–68.
- 686 Burgman, Mark, Frith Jarrad, and Ellen Main. 2015. “Decreasing Geographic Bias in Conservation Biology.”  
687 *Conservation Biology* 29 (5): 1255–56.
- 688 Caulfield, Timothy, Shawn He Harmon, and Yann Joly. 2012. “Open Science versus Commercialization: A Modern  
689 Research Conflict?” *Genome Medicine* 4 (2): 17.
- 690 Debat, Humberto, and Dominique Babini. 2020. “Plan S in Latin America: A Precautionary Note.” *Scholarly and  
691 Research Communication* 11 (1): 12.
- 692 Eisen, Michael. 2019. “Peer Review: New Initiatives to Enhance the Value of eLife’s Process.” *eLife*, November.  
693 [https://elifesciences.org/inside-elifesciences/e9091cea/peer-review-new-initiatives-to-enhance-the-value-of-elifesciences-  
694 process](https://elifesciences.org/inside-elifesciences/e9091cea/peer-review-new-initiatives-to-enhance-the-value-of-elifesciences-process).
- 695 Fraser, Nicholas, Fakhri Momeni, Philipp Mayr, and Isabella Peters. 2020. “The Relationship between bioRxiv  
696 Preprints, Citations and Altmetrics.” *Quantitative Science Studies*, April, 1–39.
- 697 Fu, Darwin Y., and Jacob J. Hughey. 2019. “Releasing a Preprint Is Associated with More Attention and Citations  
698 for the Peer-Reviewed Article.” *eLife* 8 (December): e52646.
- 699 Gauffriau, Marianne, Peder Olesen Larsen, Isabelle Maye, Anne Roulin-Perriard, and Markus von Ins. 2008.  
700 “Comparisons of Results of Publication Counting Using Different Methods.” *Scientometrics* 77 (1): 147–76.
- 701 Glänzel, Wolfgang, and András Schubert. 2005. “Analysing Scientific Networks Through Co-Authorship.” In  
702 *Handbook of Quantitative Science and Technology Research: The Use of Publication and Patent Statistics in  
703 Studies of S&T Systems*, edited by Henk F. Moed, Wolfgang Glänzel, and Ulrich Schmoch, 257–76. Dordrecht:  
704 Springer Netherlands.
- 705 González-Alcaide, Gregorio, Jinseo Park, Charles Huamani, and José M. Ramos. 2017. “Dominance and Leadership  
706 in Research Activities: Collaboration between Countries of Differing Human Development Is Reflected  
707 through Authorship Order and Designation as Corresponding Authors in Scientific Publications.” *PLOS One* 12  
708 (8): e0182513.
- 709 Hagen, Nils T. 2013. “Harmonic Coauthor Credit: A Parsimonious Quantification of the Byline Hierarchy.” *Journal  
710 of Informetrics* 7 (4): 784–91.
- 711 Kim, Jinseok, and Jana Diesner. 2015. “Coauthorship Networks: A Directed Network Approach Considering the  
712 Order and Number of Coauthors.” *Journal of the Association for Information Science and Technology* 66 (12):  
713 2685–96.

- 714 Lee, Carole J., Cassidy R. Sugimoto, Guo Zhang, and Blaise Cronin. 2013. "Bias in Peer Review." *Journal of the*  
715 *American Society for Information Science and Technology* 64 (1): 2–17.
- 716 Mammides, Christos, Uromi M. Goodale, Richard T. Corlett, Jin Chen, Kamaljit S. Bawa, Hetal Hariya, Frith  
717 Jarrad, et al. 2016. "Increasing Geographic Diversity in the International Conservation Literature: A Stalled  
718 Process?" *Biological Conservation* 198 (June): 78–83.
- 719 Mattsson, Pauline, Carl Johan Sundberg, and Patrice Laget. 2011. "Is Correspondence Reflected in the Author  
720 Position? A Bibliometric Study of the Relation between Corresponding Author and Byline Position."  
721 *Scientometrics* 87 (1): 99–105.
- 722 Mongeon, Philippe, and Adèle Paul-Hus. 2016. "The Journal Coverage of Web of Science and Scopus: A  
723 Comparative Analysis." *Scientometrics* 106 (1): 213–28.
- 724 Moya-Anegón, Félix de, Zaida Chinchilla-Rodríguez, Benjamín Vargas-Quesada, Elena Corera-Álvarez, Francisco  
725 José Muñoz-Fernández, Antonio González-Molina, and Victor Herrero-Solana. 2007. "Coverage Analysis of  
726 Scopus: A Journal Metric Approach." *Scientometrics* 73 (1): 53–78.
- 727 Mukunth, Vasudevan. 2019. "India Will Skip Plan S, Focus on National Efforts in Science Publishing." *The Wire:*  
728 *Science*. October 26, 2019. [https://science.thewire.in/the-sciences/plan-s-open-access-scientific-publishing-](https://science.thewire.in/the-sciences/plan-s-open-access-scientific-publishing-article-processing-charge-insa-k-vijayraghavan/)  
729 [article-processing-charge-insa-k-vijayraghavan/](https://science.thewire.in/the-sciences/plan-s-open-access-scientific-publishing-article-processing-charge-insa-k-vijayraghavan/).
- 730 Narock, Tom, and Evan B. Goldstein. 2019. "Quantifying the Growth of Preprint Services Hosted by the Center for  
731 Open Science." *Publications* 7 (2): 44.
- 732 Neuwirth, Erich. 2014. "RColorBrewer: ColorBrewer Palettes. R Package Version 1.1-2." *The R Foundation*.  
733 <https://CRAN.R-project.org/package=RColorBrewer>.
- 734 Okike, Kanu, Mininder S. Kocher, Charles T. Mehlman, James D. Heckman, and Mohit Bhandari. 2008.  
735 "Nonscientific Factors Associated with Acceptance for Publication in The Journal of Bone and Joint Surgery  
736 (American Volume)." *The Journal of Bone and Joint Surgery. American Volume* 90 (11): 2432–37.
- 737 Penfold, Naomi C., and Jessica K. Polka. 2020. "Technical and Social Issues Influencing the Adoption of Preprints  
738 in the Life Sciences." *PLoS Genetics* 16 (4): e1008565.
- 739 PostgreSQL Global Development Group. 2017. *PostgreSQL* (version 9.6.6). <https://www.postgresql.org>.
- 740 R Core Team. 2019. *R: A Language and Environment for Statistical Computing* (version 3.6.2). <http://r-project.org>.
- 741 Research Organization Registry. 2019. *ROR API* (version a3b153c). Github. [https://github.com/ror-community/ror-](https://github.com/ror-community/ror-api)  
742 [api](https://github.com/ror-community/ror-api).
- 743 Riesenber, D., and G. D. Lundberg. 1990. "The Order of Authorship: Who's on First?" *JAMA: The Journal of the*  
744 *American Medical Association* 264 (14): 1857.
- 745 Ross, Joseph S., Cary P. Gross, Mayur M. Desai, Yuling Hong, Augustus O. Grant, Stephen R. Daniels, Vladimir C.  
746 Hachinski, Raymond J. Gibbons, Timothy J. Gardner, and Harlan M. Krumholz. 2006. "Effect of Blinded Peer  
747 Review on Abstract Acceptance." *Journal of the American Medical Association* 295 (14): 1675–80.
- 748 Saposnik, Gustavo, Bruce Ovbiagele, Stavroula Raptis, Marc Fisher, and S. Claiborne Johnston. 2014. "Effect of  
749 English Proficiency and Research Funding on Acceptance of Submitted Articles to Stroke Journal." *Stroke* 45  
750 (6): 1862–68.
- 751 Sarabipour, Sarvenaz, Humberto J. Debat, Edward Emmott, Steven J. Burgess, Benjamin Schwessinger, and Zach  
752 Hensel. 2019. "On the Value of Preprints: An Early Career Researcher Perspective." *PLOS Biology* 17 (2):  
753 e3000151.
- 754 Schwarz, Greg J., and Robert C. Kennicutt Jr. 2004. "Demographic and Citation Trends in Astrophysical Journal  
755 Papers and Preprints." *arXiv [astro-Ph]*. arXiv. <http://arxiv.org/abs/astro-ph/0411275>.
- 756 "Scimago Journal & Country Rank." n.d. Accessed February 15, 2020. <https://www.scimagojr.com>.
- 757 Sever, Richard, Ted Roeder, Samantha Hindle, Linda Sussman, Kevin-John Black, Janet Argentine, Wayne Manos,  
758 and John R. Inglis. 2019. "bioRxiv: The Preprint Server for Biology." *bioRxiv*, November.  
759 <https://doi.org/10.1101/833400>.
- 760 "SJR - Help." n.d. Accessed April 7, 2020. <https://www.scimagojr.com/help.php>.
- 761 South, Andy. 2011. "Rworldmap: A New R Package for Mapping Global Data." *The R Journal* 3 (1).  
762 [http://www.econ.upf.edu/~michael/visualdata/RJournal\\_2011-1\\_South.pdf](http://www.econ.upf.edu/~michael/visualdata/RJournal_2011-1_South.pdf).
- 763 "Statistics." n.d. Global Research Identifier Database. Accessed February 2, 2020. <https://www.grid.ac/stats>.
- 764 "Systemic Reforms and Further Consultation Needed to Make Plan S a Success." 2018. European Federation of  
765 Academies of Sciences and Humanities. December 12, 2018. [https://allea.org/systemic-reforms-and-further-](https://allea.org/systemic-reforms-and-further-consultation-needed-to-make-plan-s-a-success/)  
766 [consultation-needed-to-make-plan-s-a-success/](https://allea.org/systemic-reforms-and-further-consultation-needed-to-make-plan-s-a-success/).
- 767 "Trends in Preprints." 2019. PLOS. October 8, 2019. <https://plos.org/blog/announcement/trends-in-preprints/>.
- 768 Vence, Tracy. 2017. "Journals Seek out Preprints." *The Scientist*, January 18, 2017. [https://www.the-](https://www.the-scientist.com/news-opinion/journals-seek-out-preprints-32183)  
769 [scientist.com/news-opinion/journals-seek-out-preprints-32183](https://www.the-scientist.com/news-opinion/journals-seek-out-preprints-32183).

- 770 Walsh, John P., and Hsini Huang. 2014. "Local Context, Academic Entrepreneurship and Open Science: Publication  
771 Secrecy and Commercial Activity among Japanese and US Scientists." *Research Policy* 43 (2): 245–60.
- 772 Whitley, Elise, and Jonathan Ball. 2002. "Statistics Review 4: Sample Size Calculations." *Critical Care* 6 (4): 335.
- 773 Wickham, Hadley. 2016. *ggplot2: Elegant Graphics for Data Analysis*. Springer.
- 774 Wong, Janice C., Kimberly A. Fernandes, Shubarna Amin, Zarnie Lwin, and Monika K. Krzyzanowska. 2014.  
775 "Involvement of Low- and Middle-Income Countries in Randomized Controlled Trial Publications in  
776 Oncology." *Globalization and Health* 10 (December): 83.
- 777 Woodruff, Andy, and Cynthia Brewer. 2017. *Colorbrewer*. Github. <https://github.com/axismaps/colorbrewer>.
- 778 Wuchty, Stefan, Benjamin F. Jones, and Brian Uzzi. 2007. "The Increasing Dominance of Teams in Production of  
779 Knowledge." *Science* 316 (5827): 1036–39.
